# Supplementary material for: The Cytotoxic Effects of Fine Particulate Matter (PM2.5) from Different Sources at the Air–Liquid Interface Exposure on A549 Cells
Source: MDPI journal article supplement (doi:10.3390/toxics12010021), 2023-12-25
Supplement: s1 [file s1]

**Table S1**Content of water-soluble ions in PM<sub>2.5</sub>.

| Ions                          | Residential-source<br>Mean(mg/g) | Industrial-source<br>Mean(mg/g) | Traffic-source<br>Mean(mg/g) |
|-------------------------------|----------------------------------|---------------------------------|------------------------------|
| Na <sup>+</sup>               | 1.29                             | 0.40                            | 1.14                         |
| NH <sub>4</sub> <sup>+</sup>  | 10.44                            | 15.25                           | 14.65                        |
| K <sup>+</sup>                | 1.53                             | 1.04                            | 0.47                         |
| Mg <sup>2+</sup>              | 0.30                             | 0.16                            | 0.16                         |
| Ca <sup>2+</sup>              | 2.06                             | 1.26                            | 2.20                         |
| F <sup>-</sup>                | 0.17                             | 0.11                            | 0.18                         |
| Cl <sup>-</sup>               | 2.98                             | 3.50                            | 3.93                         |
| SO <sub>4</sub> <sup>2-</sup> | 21.06                            | 22.75                           | 23.63                        |
| NO <sub>3</sub> <sup>-</sup>  | 21.17                            | 31.07                           | 30.97                        |

**Table S2**Content of OC and EC in PM<sub>2.5</sub>.

| Species | Residential-source<br>Mean ± SD (μg/m <sup>3</sup> ) | Industrial-source<br>Mean ± SD (μg/m <sup>3</sup> ) | Traffic-source<br>Mean ± SD (μg/m <sup>3</sup> ) |
|---------|------------------------------------------------------|-----------------------------------------------------|--------------------------------------------------|
| OC      | 6.07 ± 2.48                                          | 7.05 ± 1.87                                         | 10.37 ± 4.65                                     |
| EC      | 0.76 ± 0.66                                          | 1.14 ± 0.45                                         | 1.52 ± 0.81                                      |

**Table S3**Concentrations of metal elements in PM<sub>2.5</sub> as measured by ICP-MS.

| Metal element | Residential-source<br>Mean(mg/g) | Industrial-source<br>Mean(mg/g) | Traffic-source<br>Mean(mg/g) |
|---------------|----------------------------------|---------------------------------|------------------------------|
| Al            | 5.26                             | 6.99                            | 5.60                         |
| V             | 0.30                             | 0.46                            | 0.34                         |
| Cr            | 1.01                             | 0.39                            | 1.19                         |
| Mn            | 2.52                             | 3.36                            | 2.60                         |
| Fe            | 12.34                            | 15.39                           | 14.43                        |
| Co            | 0.02                             | 0.03                            | 0.02                         |
| Ni            | 0.08                             | 0.22                            | 0.17                         |
| Cu            | 0.87                             | 0.99                            | 5.09                         |
| Zn            | 12.20                            | 17.41                           | 21.13                        |
| As            | 0.58                             | 0.61                            | 0.42                         |
| Se            | 0.17                             | 0.23                            | 0.33                         |
| Cd            | 0.10                             | 0.14                            | 0.10                         |
| Ba            | 0.62                             | 0.73                            | 1.79                         |
| Pb            | 2.14                             | 3.07                            | 2.53                         |
| Sr            | 0.60                             | 0.38                            | 1.51                         |
| Sb            | 0.24                             | 0.32                            | 0.20                         |
| Ti            | 0.24                             | 0.15                            | 0.15                         |

**Table S4**Content of PAHs in PM<sub>2.5</sub> obtained from GC–MS.

| Species                | Residential–source<br>Mean(ng/mg) | Industrial–source<br>Mean(ng/mg) | Traffic–source<br>Mean(ng/mg) |
|------------------------|-----------------------------------|----------------------------------|-------------------------------|
| Naphthalene            | 0.21                              | 0.39                             | 0.22                          |
| Acenaphthene           | 0.29                              | 0.68                             | 0.62                          |
| Acenaphthylene         | 0.45                              | 0.52                             | 0.87                          |
| Fluorene               | 0.54                              | 0.90                             | 1.14                          |
| Phenanthrene           | 2.69                              | 3.75                             | 6.46                          |
| Anthracene             | 0.77                              | 0.35                             | 1.83                          |
| Fluoranthene           | 7.52                              | 7.81                             | 13.86                         |
| Pyrene                 | 7.16                              | 9.33                             | 13.35                         |
| Benzo[a]anthracene     | 2.78                              | 4.89                             | 5.77                          |
| Chrysene               | 4.48                              | 5.02                             | 9.36                          |
| Benzo[b&k]fluoranthene | 6.33                              | 7.34                             | 11.28                         |
| Benzo[a]pyrene         | 2.79                              | 3.83                             | 5.55                          |
| Indenopyrene           | 5.40                              | 7.10                             | 9.15                          |
| Benzo[ghi]perylene     | 5.48                              | 7.60                             | 9.58                          |
| Dibenzo[ah]anthracene  | 1.40                              | 1.65                             | 2.29                          |

**Table S5**Content of endotoxin in PM<sub>2.5</sub>.

| Species   | Residential–source<br>Mean ± SD (EU/mg) | Industrial–source<br>Mean ± SD (EU/mg) | Traffic–source<br>Mean ± SD (EU/mg) |
|-----------|-----------------------------------------|----------------------------------------|-------------------------------------|
| Endotoxin | 0.06 ± 0.01                             | 0.11 ± 0.01                            | 0.12 ± 0.01                         |

**Table S6**Pearson correlation coefficient between cytotoxic effect indexes and PAHs of PM<sub>2.5</sub>.“\*\*\*” means  $p < 0.01$ .

| Species            | Cell<br>viability | ROS            | TNF- $\alpha$  | IL-6           | Apoptosis<br>rate | DNA<br>damage  |
|--------------------|-------------------|----------------|----------------|----------------|-------------------|----------------|
| Naphthalene        | -0.762            | <b>0.893**</b> | 0.791          | 0.789          | <b>0.862**</b>    | <b>0.866**</b> |
| Acenaphthene       | <b>-0.809**</b>   | <b>0.930**</b> | <b>0.900**</b> | <b>0.857**</b> | <b>0.963**</b>    | <b>0.923**</b> |
| Acenaphthylene     | <b>-0.812**</b>   | <b>0.912**</b> | <b>0.947**</b> | <b>0.910**</b> | <b>0.939**</b>    | <b>0.921**</b> |
| Fluorene           | <b>-0.831**</b>   | <b>0.942**</b> | <b>0.951**</b> | <b>0.907**</b> | <b>0.978**</b>    | <b>0.945**</b> |
| Phenanthrene       | -0.788            | <b>0.884**</b> | <b>0.930**</b> | <b>0.880**</b> | <b>0.933**</b>    | <b>0.896**</b> |
| Anthracene         | -0.623            | 0.677          | 0.780          | 0.739          | 0.721             | 0.704          |
| Fluoranthene       | <b>-0.807**</b>   | <b>0.904**</b> | <b>0.941**</b> | <b>0.909**</b> | <b>0.925**</b>    | <b>0.914**</b> |
| Pyrene             | <b>-0.835**</b>   | <b>0.942**</b> | <b>0.959**</b> | <b>0.924**</b> | <b>0.965**</b>    | <b>0.947**</b> |
| Benzo[a]anthracene | <b>-0.832**</b>   | <b>0.947**</b> | <b>0.947**</b> | <b>0.903**</b> | <b>0.981**</b>    | <b>0.947**</b> |

|                        |                 |                |                |                |                |                |
|------------------------|-----------------|----------------|----------------|----------------|----------------|----------------|
| Chrysene               | -0.790          | <b>0.883**</b> | <b>0.931**</b> | <b>0.890**</b> | <b>0.919**</b> | <b>0.896**</b> |
| Benzo[b&k]fluoranthene | <b>-0.830**</b> | <b>0.935**</b> | <b>0.957**</b> | <b>0.926**</b> | <b>0.952**</b> | <b>0.941**</b> |
| Benzo[a]pyrene         | <b>-0.828**</b> | <b>0.934**</b> | <b>0.955**</b> | <b>0.915**</b> | <b>0.964**</b> | <b>0.940**</b> |
| Indenopyrene           | <b>-0.850**</b> | <b>0.964**</b> | <b>0.965**</b> | <b>0.936**</b> | <b>0.975**</b> | <b>0.964**</b> |
| Benzo[ghi]perylene     | <b>-0.849**</b> | <b>0.963**</b> | <b>0.963**</b> | <b>0.932**</b> | <b>0.978**</b> | <b>0.963**</b> |
| Dibenzo[ah]anthracene  | <b>-0.847**</b> | <b>0.958**</b> | <b>0.964**</b> | <b>0.939**</b> | <b>0.964**</b> | <b>0.959**</b> |

**Table S7**

Pearson correlation coefficient between cytotoxic effect indexes in A549 cells.

“\*\*\*” means  $p < 0.01$ .

|                | cell viability  | ROS             | TNF- $\alpha$   | IL-6            | apoptosis rate  | DNA damage      |
|----------------|-----------------|-----------------|-----------------|-----------------|-----------------|-----------------|
| Cell viability | 1               | <b>-0.847**</b> | <b>-0.860**</b> | <b>-0.853**</b> | <b>-0.824**</b> | <b>-0.848**</b> |
| ROS            | <b>-0.847**</b> | 1               | <b>0.927**</b>  | <b>0.923**</b>  | <b>0.955**</b>  | <b>0.987**</b>  |
| TNF- $\alpha$  | <b>-0.860**</b> | <b>0.927**</b>  | 1               | <b>0.953**</b>  | <b>0.950**</b>  | <b>0.928**</b>  |
| IL-6           | <b>-0.853**</b> | <b>0.923**</b>  | <b>0.953**</b>  | 1               | <b>0.897**</b>  | <b>0.927**</b>  |
| apoptosis rate | <b>-0.824**</b> | <b>0.955**</b>  | <b>0.950**</b>  | <b>0.897**</b>  | 1               | <b>0.947**</b>  |
| DNA damage     | <b>-0.848**</b> | <b>0.987**</b>  | <b>0.928**</b>  | <b>0.927**</b>  | <b>0.947**</b>  | 1               |
